# Supplementary material for: Clinical relevance of IDH1/2 mutant allele burden during follow-up in acute myeloid leukemia. A study by the French ALFA group
Source: PubMed Central journal article supplement — Haematologica. 2018 Feb 22;103(5):822–9. doi: 10.3324/haematol.2017.183525 (PMC5927984; doi:10.3324/haematol.2017.183525), 2018-05
Supplement: 2017.183525.FERRET_SUPPL.pdf [file 2017.183525.FERRET_SUPPL.pdf]

## Clinical relevance of *IDH1/2* mutant allele burden during follow-up in acute myeloid leukemia. A study by the French ALFA group

Yann Ferret,<sup>1,2,3</sup> Nicolas Boissel,<sup>4,5</sup> Nathalie Helevaut,<sup>1</sup> Jordan Madic,<sup>6</sup> Olivier Nibourel,<sup>1,2,3</sup> Alice Marceau-Renaut,<sup>1,2,3</sup> Maxime Bucci,<sup>1</sup> Sandrine Geffroy,<sup>1</sup> Karine Celli-Lebras,<sup>7</sup> Sylvie Castaigne,<sup>8</sup> Xavier Thomas,<sup>9</sup> Christine Terré,<sup>10</sup> Hervé Dombret,<sup>4,5</sup> Claude Preudhomme<sup>1,2,3</sup> and Aline Renneville<sup>1,2,3</sup>

<sup>1</sup>Hematology Laboratory, Biology and Pathology Center, CHRU of Lille; <sup>2</sup>INSERM, UMR-S 1172, Cancer Research Institute of Lille; <sup>3</sup>University of Lille, F-59000; <sup>4</sup>Hematology Department, Saint-Louis Hospital, AP-HP, Paris; <sup>5</sup>EA3518, Institut Universitaire d'Hématologie (IUH), University 7 Paris Diderot; <sup>6</sup>Circulating Biomarkers Laboratory, Curie Institute, Paris; <sup>7</sup>Acute Leukemia French Association (ALFA) coordination, Saint-Louis Hospital, AP-HP, Paris; <sup>8</sup>Hematology Department, Versailles Hospital, Le Chesnay; <sup>9</sup>Hematology Department, Lyon Sud Hospital, Pierre Benite and <sup>10</sup>Cytogenetic Laboratory, Versailles Hospital, Le Chesnay, France

©2018 Ferrata Storti Foundation. This is an open-access paper. doi:10.3324/haematol.2017.183525

Received: October 29, 2017.

Accepted: February 16, 2018.

Pre-published: February 22, 2018.

Correspondence: [aline.renneville@gmail.com](mailto:aline.renneville@gmail.com)

---

## Supplemental data

Supplemental data from: Y. Ferret, *et al.* Clinical relevance of *IDH1/2* mutant allele fraction during follow-up in acute myeloid leukemia. A Study by the French ALFA group.

### Supplemental data contents:

#### Supplementary Methods

#### Supplementary Tables

Table S1. Limit of detection of the droplet digital PCR assays measured on genomic DNA extracted from *IDH1/2* wild-type pooled blood lymphocytes (PBL), according to the type of *IDH1/2* mutations.

Table S2. List of sequenced regions in the Ampliseq 6-gene panel.

Table S3. List of sequenced regions in the Ampliseq 26-gene panel.

Table S4. List of sequenced regions in the Haloplex 42-gene panel.

Table S5. Patients and gene mutations considered for this study.

#### Supplementary Figures

Figure S1. Representative examples of 2-D plots of droplet fluorescence for *IDH1/2* wild-type controls and *IDH1/2* mutated samples, according to the type of *IDH1/2* mutations.

Figure S2. Comparison of the *NPM1* and *IDH1/2* variant allele frequencies in diagnostic samples from 34 patients carrying both mutations.

#### Supplementary References

## Supplementary Methods

### ***Cytogenetic analysis***

Cytogenetic G-banding analysis was performed according to standard methods. The definition of a cytogenetic clone and descriptions of karyotypes followed the International System for Human Cytogenetic Nomenclature.<sup>1</sup> To establish normal karyotype AML, at least 20 metaphase cells from diagnostic BM had to be evaluated and the karyotype had to be found normal in each metaphase.

### ***Gene mutation analysis and DNA sequencing***

*FLT3* internal tandem duplication (*FLT3*-ITD),<sup>2</sup> mutations of *FLT3* tyrosine kinase domain (*FLT3*-TKD) (*FLT3* D835/I836),<sup>2</sup> *NPM1* (exon 11),<sup>3</sup> *CEBPA*,<sup>4</sup> *IDH1* (exon 4) and *IDH2* (exon 4),<sup>2</sup> were assessed centrally as previously described on genomic DNA extracted from diagnostic BM or PB samples.

Targeted next-generation sequencing (NGS) assays using different gene panels were also performed at AML diagnosis in 100/103 patients to assess the mutational status of *DNMT3A* (exons 2-23), *TET2* (exons 3-11), and for some patients, *IDH1/2* and *NPM1* mutations. Further details regarding these NGS assays are provided below.

### ***Next-generation sequencing analysis***

In 100 out of 103 patients included in this study, native genomic DNA was available at AML diagnosis for NGS analysis. For patients included in the ALFA-0702 trial, DNA samples were analyzed with either the Ampliseq 6-gene panel (n=14) or Ampliseq 26-gene panel (n=62) and the Ion PGM sequencing platform. For patients included in the ALFA-0701 trial, DNA samples were analyzed with an Haloplex 42-gene panel and an Illumina sequencing platform (n=24). Mutations of genes shared by the 3 NGS panels and mutated in  $\geq 4$  patients in our cohort (i.e. *DNMT3A* and *TET2*) were considered for statistical analysis, in addition to *IDH1/2*, *NPM1* and *FLT3*.

#### *1) Library preparation and sequencing*

- *Ampliseq 6-gene panel*

Mutations in a selected panel of 6 genes (*ASXL1*, *EZH2*, *DNMT3A*, *RUNX1*, *TET2*, *TP53*) (Supplementary Table 1) were screened by a NGS assay using the Ion AmpliSeq Library Kit 2 384 (384 reactions; Thermo FisherScientific, Carlsbad, CA). Multiplex PCR amplifications (196 primer pairs in 3 pools) were performed from 3 x 10 ng of native genomic DNA.

Amplified DNA samples were treated with FuPa reagent to partially digest the primer sequences. Barcodes and adaptors were then added to amplicons by ligation. Products were subjected to 2 successive purifications on AMPure beads (BeckmanCoulter, Brea,CA). The Agilent 2100 Bioanalyzer and the Agilent High sensitivity DNA kit were used to quantify and normalize the libraries, before pooling. Emulsion PCR was performed using the OneTouch 2 instrument (Thermo Fisher Scientific). Enrichment was performed with the ES Ion OneTouch (Ion One Touch 200 Template kit V2) and checked with the Ion Sphere Quality Control Kit. Sequencing was performed with the Ion PGM system (Thermo Fisher Scientific) onto the 316 chip (15 samples per chip).

- *Ampliseq 26-gene panel*

Mutations in a selected panel of 26 genes (*ASXL1, CBL, DNMT3A, ETV6, EZH2, FLT3-TKD, IDH1, IDH2, JAK2, KIT, KRAS, MPL, NRAS, NPM1, PHF6, PTPN11, RIT1, RUNX1, SETBP1, SF3B1, SRSF2, TET2, TP53, U2AF1, WT1, and ZRSR2*) (Supplementary Table 2) were screened by a NGS assay using the Ion AmpliSeq Library Kit 2.0 (384 reactions; Thermo FisherScientific, Carlsbad, CA). Multiplex PCR amplifications (233 primer pairs in 2 pools) were performed from 2 x 10 ng of native genomic DNA. Amplified DNA samples were treated with FuPa reagent to partially digest the primer sequences. Barcodes and adaptors were then added to amplicons by ligation. Products were subjected to 2 successive purifications on AMPure beads (BeckmanCoulter, Brea,CA). The Agilent 2100 Bioanalyzer and the Agilent High sensitivity DNA kit were used to quantify and normalize the libraries, before pooling. Emulsion PCR was performed using the OneTouch 2 instrument (Thermo Fisher Scientific). Enrichment was performed with the ES Ion OneTouch (Ion One Touch 200 Template kit V2) and checked with the Ion Sphere Quality Control Kit. Sequencing was performed with the Ion PGM system (Thermo Fisher Scientific) onto the 318 V2 chip (15 samples per chip).

In addition to those Ampliseq assays, all the samples were also screened for *ASXL1* (including c.1934dupG; p.G646WfsX12) and *SRSF2* mutations by Sanger sequencing.

- *Haloplex 42-gene panel*

Mutations in a selected panel of 37 genes (*ASXL1, BCOR, BCORL1, CALR, CBL,CEBPA, CSF3R, DNMT3A, ETV6, EZH2, FLT3, GATA2, IDH1, IDH2, JAK2, KIT, KRAS, MPL, NIPBL, NPM1, NRAS, PHF6, PTPN11, RAD21, RIT1, RUNX1, SETBP1, SF3B1, SMC1A, SMC3, SRSF2, STAG2, TET2, TP53, U2AF1, WT1, and ZRSR2*) (Supplementary Table 3) were screened by a NGS assay using the Haloplex Target Enrichment System (96 reactions; Agilent technology, Santa Clara, CA). Digestion with 8 pairs of restriction enzymes was

performed using 8 x 25 ng of native genomic DNA. After digestion, probes and index were added to the targeted DNA fragments for hybridization (4463 biotinylated probes) and simultaneous circularization. The circularized DNA fragments-probe-index complexes were captured by streptavidin beads. The circular DNA fragments were then closed by ligation, incorporating the index. After elution, the circular DNA fragments were amplified with universal primers containing the sequencing adaptors, and were subjected to a selective purification on AMPure beads (BeckmanCoulter, Brea, CA). Sequencing was performed with the MiSeq (Illumina, San Diego, CA) with the Miseq reagent 300v2 kit (14 samples per flowcell).

## 2) *Bioinformatic analysis*

### ▪ *Ion PGM platform*

The hg19 version of the human genome was used as a reference sequence. Base calls were generated by the Torrent Browser software (5.0.4 version) using the included variant caller with an additional plug-in (Thermo Fisher Scientific). The .bam and.vcf files were used for further analysis. The .vcf files were annotated with the Ion reporter software (Thermo Fisher Scientific) and processed for a second analysis of the indexed files using the Sequence Pilot software (4.2.1 version) (JSI Medical Systems, Ettenheim, Germany). Results were compared with selection of variants that will be further considered. For each variant, depth at the variant position (number of mutated reads and unmutated reads) was considered to calculate variant allele frequency (VAF), which is the proportion of mutated reads among total reads.

### ▪ *Illumina platform*

The hg19 version of the human genome was used as a reference sequence. The .fastq files were generated by the Miseq reporter software (2.6 version, Illumina). Base calls and variant annotations were performed with different bioinformatics analysis tools (GATK, Broad Institute; Burrows-Wheeler; Picard-tool, Broad Institute; Trim-galore, Babraham Bioinformatics). A second analysis of the indexed files was processed using the Sequence Pilot software (4.2.1 version) (JSI Medical Systems, Ettenheim, Germany). Results were compared with selection of variants that will be further considered.

## Supplementary Tables

**Table S1. Limit of detection of the droplet digital PCR assays measured on genomic DNA extracted from *IDH1/2* wild-type pooled blood lymphocytes (PBL), according to the type of *IDH1/2* mutations.**

| <b>Mutation</b>     | <b>No. of wells tested</b> | <b>Mean VAF (%)</b> | <b>SD</b> | <b>LOD (%)</b> |
|---------------------|----------------------------|---------------------|-----------|----------------|
| <i>IDH2</i> p.R140Q | 30                         | 0.034               | 0.018     | 0.09           |
| <i>IDH2</i> p.R172K | 20                         | 0.019               | 0.008     | 0.04           |
| <i>IDH1</i> p.R132C | 10                         | 0.107               | 0.023     | 0.18           |
| <i>IDH1</i> p.R132H | 10                         | 0.055               | 0.012     | 0.09           |
| <i>IDH1</i> p.R132G | 10                         | 0.012               | 0.015     | 0.058          |

Abbreviations: VAF, variant allele fraction, SD, Standard deviation; LOD, limit of detection.

**Table S2. List of sequenced regions in the Ampliseq 6-gene panel**

| <b>Gene</b>   | <b>Reference sequence</b> | <b>Exons analyzed</b> |
|---------------|---------------------------|-----------------------|
| <i>ASXL1</i>  | NM_015338                 | 2-12                  |
| <i>DNMT3A</i> | NM_022552                 | 2-23                  |
| <i>EZH2</i>   | NM_004456                 | 2-20                  |
| <i>RUNX1</i>  | NM_001001890              | 1-6                   |
| <i>TET2</i>   | NM_001127208              | 3-11                  |
| <i>TP53</i>   | NM_001126112              | 2-11                  |

**Table S3. List of sequenced regions in the Ampliseq 26-gene panel**

| <b>Gene</b>   | <b>Reference sequence</b> | <b>Exons analyzed</b> |
|---------------|---------------------------|-----------------------|
| <i>ASXL1</i>  | NM_015338                 | 11-12                 |
| <i>CBL</i>    | NM_005188                 | 8-9                   |
| <i>DNMT3A</i> | NM_022552                 | 2-23                  |
| <i>ETV6</i>   | NM_001987                 | 1-8                   |
| <i>EZH2</i>   | NM_004456                 | 2-20                  |
| <i>FLT3</i>   | NM_004119                 | 14, 15, 20            |
| <i>IDH1</i>   | NM_005896                 | 4                     |
| <i>IDH2</i>   | NM_002168                 | 4                     |
| <i>JAK2</i>   | NM_004972                 | 12, 14                |
| <i>KIT</i>    | NM_000222                 | 8, 11, 17             |
| <i>KRAS</i>   | NM_033360                 | 2-3                   |
| <i>MPL</i>    | NM_005373                 | 10                    |
| <i>NPM1</i>   | NM_002520                 | 11                    |
| <i>NRAS</i>   | NM_002524                 | 2-3                   |
| <i>PHF6</i>   | NM_001015877              | 2-10                  |
| <i>PTPN11</i> | NM_002834                 | 3                     |
| <i>RIT1</i>   | NM_006912                 | 5                     |
| <i>RUNX1</i>  | NM_001001890              | 1-6                   |
| <i>SETBP1</i> | NM_015559.2               | 4                     |
| <i>SF3B1</i>  | NM_012433                 | 13-16                 |
| <i>SRSF2</i>  | NM_003016                 | 1                     |
| <i>TET2</i>   | NM_001127208              | 3-11                  |
| <i>TP53</i>   | NM_001126112              | 2-11                  |
| <i>U2AF1</i>  | NM_006758                 | 2-6                   |
| <i>WT1</i>    | NM_024426                 | 7, 9                  |
| <i>ZRSR2</i>  | NM_005089                 | 1-11                  |

**Table S4. List of sequenced regions in the Haloplex 42-gene panel**

| <b>Gene</b>   | <b>Reference sequence</b> | <b>Exons analyzed</b> |
|---------------|---------------------------|-----------------------|
| <i>ASXL1</i>  | NM_015338                 | 11-12                 |
| <i>BCOR</i>   | NM_001123385              | 2-15                  |
| <i>BCORL1</i> | NM_021946                 | 1-12                  |
| <i>BRAF6</i>  | NM_004333                 | 15                    |
| <i>CALR</i>   | NM_004343.3               | 9                     |
| <i>CBL</i>    | NM_005188                 | 8-9                   |
| <i>CEBPA</i>  | NM_004364                 | 1                     |
| <i>CSF3R</i>  | NM_172313.2               | 14                    |
| <i>DNMT3A</i> | NM_022552                 | 2-23                  |
| <i>ETV6</i>   | NM_001987                 | 1-8                   |
| <i>EZH2</i>   | NM_004456                 | 2-20                  |
| <i>FBXW7</i>  | NM_033652                 | 9-12                  |
| <i>FLT3</i>   | NM_004119                 | 14, 15, 20            |
| <i>GATA1</i>  | NM_002049                 | 2                     |
| <i>GATA2</i>  | NM_032638                 | 2-6                   |
| <i>IDH1</i>   | NM_005896                 | 4                     |
| <i>IDH2</i>   | NM_002168                 | 4                     |
| <i>JAK2</i>   | NM_004972                 | 12, 14                |
| <i>JAK3</i>   | NM_000215                 | 13                    |
| <i>KIT</i>    | NM_000222                 | 8-17                  |
| <i>KRAS</i>   | NM_033360                 | 2-3                   |
| <i>MPL</i>    | NM_005373                 | 10                    |
| <i>NIPBL</i>  | NM_133433                 | 2-47                  |
| <i>NOTCH1</i> | NM_017617                 | 26-34                 |
| <i>NPM1</i>   | NM_002520                 | 11                    |
| <i>NRAS</i>   | NM_002524                 | 2-3                   |
| <i>PHF6</i>   | NM_001015877              | 2-10                  |
| <i>PTEN</i>   | NM_000314                 | 5-7                   |
| <i>PTPN11</i> | NM_002834                 | 3-13                  |
| <i>RAD21</i>  | NM_006265                 | 2-14                  |
| <i>RUNX1</i>  | NM_001001890              | 1-6                   |
| <i>SETBP1</i> | NM_015559.2               | 4                     |
| <i>SF3B1</i>  | NM_012433                 | 13-16                 |
| <i>SMC1A</i>  | NM_006306                 | 1-25                  |
| <i>SMC3</i>   | NM_005445                 | 1-29                  |
| <i>SRSF2</i>  | NM_003016                 | 1                     |
| <i>STAG2</i>  | NM_001042749              | 3-35                  |
| <i>TET2</i>   | NM_001127208              | 3-11                  |
| <i>TP53</i>   | NM_001126112              | 2-11                  |
| <i>U2AF1</i>  | NM_006758                 | 2-6                   |
| <i>WT1</i>    | NM_024426                 | 7, 9                  |
| <i>ZRSR2</i>  | NM_005089                 | 1-11                  |



**Table S5. Patients and gene mutations considered for this study.**

| UPN      | Gene          | Reference transcript | Exon | Type of mutation        | Nucleotide variation | Protein variation | VAF (%) |
|----------|---------------|----------------------|------|-------------------------|----------------------|-------------------|---------|
| L1206290 | <i>CEBPA</i>  | NM_004364            | 1    | Frameshift              | c.109_123delinsA     | p.A37TfsX66       | NA      |
| 60074    | <i>CEBPA</i>  | NM_004364            | 1    | Frameshift              | c.199dupT            | p.Y67LfsX41       | NA      |
| L1203196 | <i>CEBPA</i>  | NM_004364            | 1    | Frameshift              | c.333_334dup         | p.P112RfsX49      | NA      |
| 36979    | <i>CEBPA</i>  | NM_004364            | 1    | Frameshift              | c.342delC            | p.G116AfsX44      | NA      |
| L1206290 | <i>CEBPA</i>  | NM_004364            | 1    | In-frame duplication    | c.937_939dup         | p.K313dup         | NA      |
| 53458    | <i>DNMT3A</i> | NM_022552            | 8    | Missense                | c.892G>C             | p.G298R           | 43      |
| L1306600 | <i>DNMT3A</i> | NM_022552            | 8    | Nonsense                | c.958C>T             | p.R320X           | 25      |
| 38932    | <i>DNMT3A</i> | NM_022552            | 12   | Splice site (intron 11) | c.1430-1G>A          |                   | 40      |
| 35066    | <i>DNMT3A</i> | NM_022552            | 14   | Missense                | c.1627G>T            | p.G543C           | 28      |
| 60074    | <i>DNMT3A</i> | NM_022552            | 14   | Missense                | c.1644G>A            | p.M548I           | 43      |
| L1201703 | <i>DNMT3A</i> | NM_022552            | 15   | Nonsense                | c.1792C>T            | p.R598X           | 50      |
| 44474    | <i>DNMT3A</i> | NM_022552            | 15   | Nonsense                | c.1816C>T            | p.Q606X           | 37      |
| L1201703 | <i>DNMT3A</i> | NM_022552            | 16   | Missense                | c.1904G>C            | p.R635P           | 17      |
| 53458    | <i>DNMT3A</i> | NM_022552            | 16   | Missense                | c.1915C>T            | p.L639F           | 37      |
| 50609    | <i>DNMT3A</i> | NM_022552            | 18   | Missense                | c.G2159G>A           | p.R720H           | 49      |
| 50609    | <i>DNMT3A</i> | NM_022552            | 19   | Missense                | c.2303A>T            | p.D768V           | 48      |
| L1201624 | <i>DNMT3A</i> | NM_022552            | 20   | Missense                | c.2374C>G            | p.R792G           | 22      |
| L1208428 | <i>DNMT3A</i> | NM_022552            | 21   | Missense                | c.2469G>C            | p.R823S           | 48      |
| 48483    | <i>DNMT3A</i> | NM_022552            | 22   | Frameshift              | c.2552delT           | p.F851SfsX2       | 43      |
| L1206288 | <i>DNMT3A</i> | NM_022552            | 23   | Missense                | c.2635A>G            | p.N879D           | 43      |
| 42190    | <i>DNMT3A</i> | NM_022552            | 23   | Missense                | c.2644C>T            | p.R882C           | 39      |
| 38936    | <i>DNMT3A</i> | NM_022552            | 23   | Missense                | c.2644C>T            | p.R882C           | 39      |
| L1200359 | <i>DNMT3A</i> | NM_022552            | 23   | Missense                | c.2644C>T            | p.R882C           | 46      |
| 47821    | <i>DNMT3A</i> | NM_022552            | 23   | Missense                | c.2644C>T            | p.R882C           | 57      |
| L1202621 | <i>DNMT3A</i> | NM_022552            | 23   | Missense                | c.2644C>T            | p.R882C           | 43      |
| 52584    | <i>DNMT3A</i> | NM_022552            | 23   | Missense                | c.2645G>A            | p.R882H           | 51      |
| 43052    | <i>DNMT3A</i> | NM_022552            | 23   | Missense                | c.2645G>A            | p.R882H           | 26      |
| 41222    | <i>DNMT3A</i> | NM_022552            | 23   | Missense                | c.2645G>A            | p.R882H           | 45      |
| L1206399 | <i>DNMT3A</i> | NM_022552            | 23   | Missense                | c.2645G>A            | p.R882H           | 48      |
| L1200167 | <i>DNMT3A</i> | NM_022552            | 23   | Missense                | c.2645G>A            | p.R882H           | 43      |
| 43506    | <i>DNMT3A</i> | NM_022552            | 23   | Missense                | c.2645G>A            | p.R882H           | 46      |
| 54485    | <i>DNMT3A</i> | NM_022552            | 23   | Missense                | c.2645G>A            | p.R882H           | 47      |
| L1200789 | <i>DNMT3A</i> | NM_022552            | 23   | Missense                | c.2645G>A            | p.R882H           | 44      |
| 51292    | <i>DNMT3A</i> | NM_022552            | 23   | Missense                | c.2645G>T            | p.R882L           | 44      |
| 45278    | <i>DNMT3A</i> | NM_022552            | 23   | Missense                | c.2645G>C            | p.R882P           | 40      |
| 57106    | <i>DNMT3A</i> | NM_022552            | 23   | Missense                | c.2645G>C            | p.R882P           | 40      |
| 42750    | <i>DNMT3A</i> | NM_022552            | 23   | Missense                | c.2696G>A            | p.R899H           | 23      |
| 60074    | <i>DNMT3A</i> | NM_022552            | 23   | Missense                | c.2710C>T            | p.P904S           | 6       |

**Table S5. Patients and gene mutations considered for this study (continued).**

| UPN      | Gene | Reference transcript | Exon | Type of mutation | Nucleotide variation | Protein variation | VAF(%) |
|----------|------|----------------------|------|------------------|----------------------|-------------------|--------|
| 48483    | IDH1 | NM_005896            | 4    | Missense         | c.394C>T             | p.R132C           | 45     |
| 39771    | IDH1 | NM_005896            | 4    | Missense         | c.394C>T             | p.R132C           | 46     |
| 48379    | IDH1 | NM_005896            | 4    | Missense         | c.394C>T             | p.R132C           | 42     |
| 35992    | IDH1 | NM_005896            | 4    | Missense         | c.394C>T             | p.R132C           | 50     |
| L1210793 | IDH1 | NM_005896            | 4    | Missense         | c.394C>T             | p.R132C           | 26     |
| L1206288 | IDH1 | NM_005896            | 4    | Missense         | c.394C>T             | p.R132C           | 35     |
| 53891    | IDH1 | NM_005896            | 4    | Missense         | c.394C>T             | p.R132C           | 15     |
| L1204485 | IDH1 | NM_005896            | 4    | Missense         | c.394C>T             | p.R132C           | 42     |
| L1303599 | IDH1 | NM_005896            | 4    | Missense         | c.394C>T             | p.R132C           | 16     |
| L1304166 | IDH1 | NM_005896            | 4    | Missense         | c.394C>T             | p.R132C           | 41     |
| L1201624 | IDH1 | NM_005896            | 4    | Missense         | c.394C>T             | p.R132C           | 42     |
| L1203356 | IDH1 | NM_005896            | 4    | Missense         | c.394C>T             | p.R132C           | 34     |
| L1200789 | IDH1 | NM_005896            | 4    | Missense         | c.394C>T             | p.R132C           | 36     |
| L1209496 | IDH1 | NM_005896            | 4    | Missense         | c.394C>T             | p.R132C           | 41     |
| L1201999 | IDH1 | NM_005896            | 4    | Missense         | c.394C>T             | p.R132C           | 18     |
| 42750    | IDH1 | NM_005896            | 4    | Missense         | c.394C>G             | p.R132G           | 23     |
| 35140    | IDH1 | NM_005896            | 4    | Missense         | c.394C>G             | p.R132G           | 36     |
| 57712    | IDH1 | NM_005896            | 4    | Missense         | c.394C>G             | p.R132G           | 37     |
| L1208428 | IDH1 | NM_005896            | 4    | Missense         | c.394C>G             | p.R132G           | 43     |
| L1205789 | IDH1 | NM_005896            | 4    | Missense         | c.394C>G             | p.R132G           | 46     |
| 40311    | IDH1 | NM_005896            | 4    | Missense         | c.395G>A             | p.R132H           | 46     |
| 35066    | IDH1 | NM_005896            | 4    | Missense         | c.395G>A             | p.R132H           | 52     |
| 38932    | IDH1 | NM_005896            | 4    | Missense         | c.395G>A             | p.R132H           | 42     |
| 44761    | IDH1 | NM_005896            | 4    | Missense         | c.395G>A             | p.R132H           | NA     |
| L1301870 | IDH1 | NM_005896            | 4    | Missense         | c.395G>A             | p.R132H           | 38     |
| 54485    | IDH1 | NM_005896            | 4    | Missense         | c.395G>A             | p.R132H           | NA     |
| L1211313 | IDH1 | NM_005896            | 4    | Missense         | c.395G>A             | p.R132H           | 40     |
| L1302995 | IDH1 | NM_005896            | 4    | Missense         | c.395G>A             | p.R132H           | 45     |
| L1302547 | IDH1 | NM_005896            | 4    | Missense         | c.395G>A             | p.R132H           | 41     |
| 55766    | IDH1 | NM_005896            | 4    | Missense         | c.395G>A             | p.R132H           | NA     |
| L1305787 | IDH1 | NM_005896            | 4    | Missense         | c.395G>A             | p.R132H           | 42     |
| L1306701 | IDH1 | NM_005896            | 4    | Missense         | c.395G>A             | p.R132H           | 46     |
| L1206290 | IDH1 | NM_005896            | 4    | Missense         | c.395G>A             | p.R132H           | 41     |
| 50609    | IDH1 | NM_005896            | 4    | Missense         | c.395G>A             | p.R132H           | NA     |
| 51380    | IDH1 | NM_005896            | 4    | Missense         | c.395G>A             | p.R132H           | 39     |
| L1202459 | IDH1 | NM_005896            | 4    | Missense         | c.395G>A             | p.R132H           | NA     |

**Table S5. Patients and gene mutations considered for this study (continued).**

| UPN      | Gene | Reference transcript | Exon | Type of mutation | Nucleotide variation | Protein variation | VAF (%) |
|----------|------|----------------------|------|------------------|----------------------|-------------------|---------|
| 44434    | IDH2 | NM_002168            | 4    | Missense         | c.419G>A             | p.R140Q           | 44      |
| 48483    | IDH2 | NM_002168            | 4    | Missense         | c.419G>A             | p.R140Q           | 42      |
| 41029    | IDH2 | NM_002168            | 4    | Missense         | c.419G>A             | p.R140Q           | 51      |
| 39550    | IDH2 | NM_002168            | 4    | Missense         | c.419G>A             | p.R140Q           | 34      |
| L1209948 | IDH2 | NM_002168            | 4    | Missense         | c.419G>A             | p.R140Q           | 53      |
| 42190    | IDH2 | NM_002168            | 4    | Missense         | c.419G>A             | p.R140Q           | NA      |
| L1201703 | IDH2 | NM_002168            | 4    | Missense         | c.419G>A             | p.R140Q           | 50      |
| L1210436 | IDH2 | NM_002168            | 4    | Missense         | c.419G>A             | p.R140Q           | 30      |
| 34795    | IDH2 | NM_002168            | 4    | Missense         | c.419G>A             | p.R140Q           | 29      |
| 38745    | IDH2 | NM_002168            | 4    | Missense         | c.419G>A             | p.R140Q           | 43      |
| 38936    | IDH2 | NM_002168            | 4    | Missense         | c.419G>A             | p.R140Q           | 25      |
| 36979    | IDH2 | NM_002168            | 4    | Missense         | c.419G>A             | p.R140Q           | 47      |
| 37408    | IDH2 | NM_002168            | 4    | Missense         | c.419G>A             | p.R140Q           | 23      |
| 43564    | IDH2 | NM_002168            | 4    | Missense         | c.419G>A             | p.R140Q           | NA      |
| 43459    | IDH2 | NM_002168            | 4    | Missense         | c.419G>A             | p.R140Q           | NA      |
| L1200359 | IDH2 | NM_002168            | 4    | Missense         | c.419G>A             | p.R140Q           | 51      |
| L1209695 | IDH2 | NM_002168            | 4    | Missense         | c.419G>A             | p.R140Q           | 50      |
| L1301864 | IDH2 | NM_002168            | 4    | Missense         | c.419G>A             | p.R140Q           | 26      |
| L1211151 | IDH2 | NM_002168            | 4    | Missense         | c.419G>A             | p.R140Q           | 47      |
| L1300811 | IDH2 | NM_002168            | 4    | Missense         | c.419G>A             | p.R140Q           | 44      |
| 47821    | IDH2 | NM_002168            | 4    | Missense         | c.419G>A             | p.R140Q           | 50      |
| L1301608 | IDH2 | NM_002168            | 4    | Missense         | c.419G>A             | p.R140Q           | 49      |
| 52584    | IDH2 | NM_002168            | 4    | Missense         | c.419G>A             | p.R140Q           | NA      |
| L1302925 | IDH2 | NM_002168            | 4    | Missense         | c.419G>A             | p.R140Q           | 35      |
| 45278    | IDH2 | NM_002168            | 4    | Missense         | c.419G>A             | p.R140Q           | 44      |
| L1202031 | IDH2 | NM_002168            | 4    | Missense         | c.419G>A             | p.R140Q           | NA      |
| 57150    | IDH2 | NM_002168            | 4    | Missense         | c.419G>A             | p.R140Q           | NA      |
| 42840    | IDH2 | NM_002168            | 4    | Missense         | c.419G>A             | p.R140Q           | NA      |
| 57106    | IDH2 | NM_002168            | 4    | Missense         | c.419G>A             | p.R140Q           | 27      |
| L1306600 | IDH2 | NM_002168            | 4    | Missense         | c.419G>A             | p.R140Q           | 23      |
| L1203196 | IDH2 | NM_002168            | 4    | Missense         | c.419G>A             | p.R140Q           | 49      |
| L1306882 | IDH2 | NM_002168            | 4    | Missense         | c.419G>A             | p.R140Q           | 38      |
| 43052    | IDH2 | NM_002168            | 4    | Missense         | c.419G>A             | p.R140Q           | 29      |
| L1202621 | IDH2 | NM_002168            | 4    | Missense         | c.419G>A             | p.R140Q           | 43      |
| 53312    | IDH2 | NM_002168            | 4    | Missense         | c.419G>A             | p.R140Q           | 46      |
| L1200370 | IDH2 | NM_002168            | 4    | Missense         | c.419G>A             | p.R140Q           | NA      |
| L1304314 | IDH2 | NM_002168            | 4    | Missense         | c.419G>A             | p.R140Q           | NA      |
| 41222    | IDH2 | NM_002168            | 4    | Missense         | c.419G>A             | p.R140Q           | 49      |
| 49624    | IDH2 | NM_002168            | 4    | Missense         | c.419G>A             | p.R140Q           | 53      |
| L1201626 | IDH2 | NM_002168            | 4    | Missense         | c.419G>A             | p.R140Q           | 43      |
| 50179    | IDH2 | NM_002168            | 4    | Missense         | c.419G>A             | p.R140Q           | NA      |
| L1204294 | IDH2 | NM_002168            | 4    | Missense         | c.419G>A             | p.R140Q           | 40      |
| 51292    | IDH2 | NM_002168            | 4    | Missense         | c.419G>A             | p.R140Q           | NA      |
| L1201420 | IDH2 | NM_002168            | 4    | Missense         | c.419G>A             | p.R140Q           | 38      |
| L1206399 | IDH2 | NM_002168            | 4    | Missense         | c.419G>A             | p.R140Q           | 52      |
| 32487    | IDH2 | NM_002168            | 4    | Missense         | c.419G>A             | p.R140Q           | 33      |

**Table S5. Patients and gene mutations considered for this study (continued).**

| UPN      | Gene        | Reference transcript | Exon | Type of mutation | Nucleotide variation | Protein variation | VAF (%) |
|----------|-------------|----------------------|------|------------------|----------------------|-------------------|---------|
| 32888    | <i>IDH2</i> | NM_002168            | 4    | Missense         | c.525G>A             | p.R172K           | 22      |
| 44474    | <i>IDH2</i> | NM_002168            | 4    | Missense         | c.525G>A             | p.R172K           | 39      |
| 43515    | <i>IDH2</i> | NM_002168            | 4    | Missense         | c.525G>A             | p.R172K           | 27      |
| 34187    | <i>IDH2</i> | NM_002168            | 4    | Missense         | c.525G>A             | p.R172K           | 39      |
| 42458    | <i>IDH2</i> | NM_002168            | 4    | Missense         | c.525G>A             | p.R172K           | NA      |
| 37365    | <i>IDH2</i> | NM_002168            | 4    | Missense         | c.525G>A             | p.R172K           | 32      |
| L1302236 | <i>IDH2</i> | NM_002168            | 4    | Missense         | c.525G>A             | p.R172K           | 22      |
| 57081    | <i>IDH2</i> | NM_002168            | 4    | Missense         | c.525G>A             | p.R172K           | 24      |
| 60074    | <i>IDH2</i> | NM_002168            | 4    | Missense         | c.525G>A             | p.R172K           | 31      |
| L1206397 | <i>IDH2</i> | NM_002168            | 4    | Missense         | c.525G>A             | p.R172K           | NA      |
| L1202978 | <i>IDH2</i> | NM_002168            | 4    | Missense         | c.525G>A             | p.R172K           | 48      |
| 53458    | <i>IDH2</i> | NM_002168            | 4    | Missense         | c.525G>A             | p.R172K           | 34      |
| 49614    | <i>IDH2</i> | NM_002168            | 4    | Missense         | c.525G>A             | p.R172K           | NA      |
| L1200167 | <i>IDH2</i> | NM_002168            | 4    | Missense         | c.525G>A             | p.R172K           | 32      |
| 38512    | <i>IDH2</i> | NM_002168            | 4    | Missense         | c.525G>A             | p.R172K           | NA      |
| L1206032 | <i>IDH2</i> | NM_002168            | 4    | Missense         | c.525G>A             | p.R172K           | NA      |
| 53395    | <i>IDH2</i> | NM_002168            | 4    | Missense         | c.525G>A             | p.R172K           | 45      |
| 48978    | <i>IDH2</i> | NM_002168            | 4    | Missense         | c.525G>A             | p.R172K           | NA      |
| L1300683 | <i>IDH2</i> | NM_002168            | 4    | Missense         | c.525G>A             | p.R172K           | NA      |
| L1204429 | <i>IDH2</i> | NM_002168            | 4    | Missense         | c.525G>A             | p.R172K           | 6       |
| 43506    | <i>IDH2</i> | NM_002168            | 4    | Missense         | c.525G>A             | p.R172K           | 43      |

**Table S5. Patients and gene mutations considered for this study (continued).**

| UPN      | Gene        | Reference transcript | Exon | Type of mutation  | Nucleotide variation | Protein variation | VAF (%) |
|----------|-------------|----------------------|------|-------------------|----------------------|-------------------|---------|
| 34795    | <i>NPM1</i> | NM_002520            | 11   | Frameshift        | c.860_863dupTCTG     | p.W288CfsX12      | 17      |
| 35066    | <i>NPM1</i> | NM_002520            | 11   | Frameshift        | c.860_863dupTCTG     | p.W288CfsX12      | 31      |
| 35140    | <i>NPM1</i> | NM_002520            | 11   | Frameshift        | c.860_863dupTCTG     | p.W288CfsX12      | 21      |
| 35992    | <i>NPM1</i> | NM_002520            | 11   | Frameshift        | c.860_863dupTCTG     | p.W288CfsX12      | 32      |
| 37408    | <i>NPM1</i> | NM_002520            | 11   | Frameshift        | c.860_863dupTCTG     | p.W288CfsX12      | 10      |
| 38932    | <i>NPM1</i> | NM_002520            | 11   | Frameshift        | c.860_863dupTCTG     | p.W288CfsX12      | 27      |
| 38936    | <i>NPM1</i> | NM_002520            | 11   | Frameshift        | c.860_863dupTCTG     | p.W288CfsX12      | 23      |
| 39550    | <i>NPM1</i> | NM_002520            | 11   | Frameshift        | c.860_863dupTCTG     | p.W288CfsX12      | 13      |
| 39771    | <i>NPM1</i> | NM_002520            | 11   | Frameshift        | c.860_863dupTCTG     | p.W288CfsX12      | 28      |
| 40311    | <i>NPM1</i> | NM_002520            | 11   | Frameshift        | c.860_863dupTCTG     | p.W288CfsX12      | 28      |
| 42190    | <i>NPM1</i> | NM_002520            | 11   | Frameshift        | c.860_863dupTCTG     | p.W288CfsX12      | NA      |
| 42750    | <i>NPM1</i> | NM_002520            | 11   | Frameshift        | c.860_863dupTCTG     | p.W288CfsX12      | 12      |
| 42840    | <i>NPM1</i> | NM_002520            | 11   | Frameshift        | c.860_863dupTCTG     | p.W288CfsX12      | NA      |
| 43564    | <i>NPM1</i> | NM_002520            | 11   | Frameshift        | c.860_863dupTCTG     | p.W288CfsX12      | NA      |
| 44434    | <i>NPM1</i> | NM_002520            | 11   | Frameshift        | c.860_863dupTCTG     | p.W288CfsX12      | 27      |
| 44761    | <i>NPM1</i> | NM_002520            | 11   | Frameshift        | c.860_863dupTCTG     | p.W288CfsX12      | NA      |
| 48483    | <i>NPM1</i> | NM_002520            | 11   | Frameshift        | c.860_863dupTCTG     | p.W288CfsX12      | 26      |
| 50179    | <i>NPM1</i> | NM_002520            | 11   | Frameshift        | c.860_863dupTCTG     | p.W288CfsX12      | NA      |
| 50609    | <i>NPM1</i> | NM_002520            | 11   | Frameshift        | c.860_863dupTCTG     | p.W288CfsX12      | NA      |
| 51292    | <i>NPM1</i> | NM_002520            | 11   | Frameshift        | c.860_863dupTCTG     | p.W288CfsX12      | NA      |
| 51380    | <i>NPM1</i> | NM_002520            | 11   | Frameshift        | c.860_863dupTCTG     | p.W288CfsX12      | 14      |
| 52584    | <i>NPM1</i> | NM_002520            | 11   | Frameshift        | c.860_863dupTCTG     | p.W288CfsX12      | NA      |
| 54485    | <i>NPM1</i> | NM_002520            | 11   | Frameshift        | c.860_863dupTCTG     | p.W288CfsX12      | NA      |
| 55766    | <i>NPM1</i> | NM_002520            | 11   | Frameshift        | c.860_863dupTCTG     | p.W288CfsX12      | NA      |
| L1201420 | <i>NPM1</i> | NM_002520            | 11   | Frameshift        | c.860_863dupTCTG     | p.W288CfsX12      | 31      |
| L1201626 | <i>NPM1</i> | NM_002520            | 11   | Frameshift        | c.860_863dupTCTG     | p.W288CfsX12      | 31      |
| L1203356 | <i>NPM1</i> | NM_002520            | 11   | Frameshift        | c.860_863dupTCTG     | p.W288CfsX12      | 30      |
| L1204294 | <i>NPM1</i> | NM_002520            | 11   | Frameshift        | c.860_863dupTCTG     | p.W288CfsX12      | 34      |
| L1204485 | <i>NPM1</i> | NM_002520            | 11   | Frameshift        | c.860_863dupTCTG     | p.W288CfsX12      | 42      |
| L1205789 | <i>NPM1</i> | NM_002520            | 11   | Frameshift        | c.860_863dupTCTG     | p.W288CfsX12      | 36      |
| L1209496 | <i>NPM1</i> | NM_002520            | 11   | Frameshift        | c.860_863dupTCTG     | p.W288CfsX12      | 36      |
| L1210436 | <i>NPM1</i> | NM_002520            | 11   | Frameshift        | c.860_863dupTCTG     | p.W288CfsX12      | 27      |
| L1300811 | <i>NPM1</i> | NM_002520            | 11   | Frameshift        | c.860_863dupTCTG     | p.W288CfsX12      | 40      |
| L1302547 | <i>NPM1</i> | NM_002520            | 11   | Frameshift        | c.860_863dupTCTG     | p.W288CfsX12      | 37      |
| L1302995 | <i>NPM1</i> | NM_002520            | 11   | Frameshift        | c.860_863dupTCTG     | p.W288CfsX12      | 35      |
| L1304166 | <i>NPM1</i> | NM_002520            | 11   | Frameshift        | c.860_863dupTCTG     | p.W288CfsX12      | 39      |
| L1304314 | <i>NPM1</i> | NM_002520            | 11   | Frameshift        | c.860_863dupTCTG     | p.W288CfsX12      | NA      |
| L1305787 | <i>NPM1</i> | NM_002520            | 11   | Frameshift        | c.860_863dupTCTG     | p.W288CfsX12      | 35      |
| L1306600 | <i>NPM1</i> | NM_002520            | 11   | Frameshift        | c.860_863dupTCTG     | p.W288CfsX12      | 20      |
| 43459    | <i>NPM1</i> | NM_002520            | 11   | Frameshift        | c.863_864insCATG     | p.W288CfsX12      | NA      |
| 57712    | <i>NPM1</i> | NM_002520            | 11   | Frameshift        | c.863_864insCATG     | p.W288CfsX12      | 31      |
| L1202031 | <i>NPM1</i> | NM_002520            | 11   | Frameshift        | c.863_864insCATG     | p.W288CfsX12      | NA      |
| L1301870 | <i>NPM1</i> | NM_002520            | 11   | Frameshift        | c.863_864insCATG     | p.W288CfsX12      | 35      |
| L1202459 | <i>NPM1</i> | NM_002520            | 11   | Frameshift        | c.863_864insCGTG     | p.W288CfsX12      | NA      |
| L1306701 | <i>NPM1</i> | NM_002520            | 11   | Frameshift        | c.863_864insCCAG     | p.W288CfsX12      | 30      |
| 38745    | <i>NPM1</i> | NM_002520            | 11   | Frameshift        | c.863_864insCCTG     | p.W288CfsX12      | 29      |
| 41029    | <i>NPM1</i> | NM_002520            | 11   | Frameshift        | c.863_864insCCTG     | p.W288CfsX12      | 29      |
| 57150    | <i>NPM1</i> | NM_002520            | 11   | Frameshift        | c.863_864insCCTG     | p.W288CfsX12      | NA      |
| L1200370 | <i>NPM1</i> | NM_002520            | 11   | Frameshift        | c.863_864insCCTG     | p.W288CfsX12      | NA      |
| L1306882 | <i>NPM1</i> | NM_002520            | 11   | Frameshift        | c.863_864insTATG     | p.W288CfsX12      | 36      |
| 48483    | <i>TET2</i> | NM_001127208         | 3    | Frameshift        | c.2348_2367del       | p.E783AfsX12      | 71      |
| 41029    | <i>TET2</i> | NM_001127208         | 3    | Frameshift        | c.2565delA           | p.A855AfsX18      | NA      |
| 42190    | <i>TET2</i> | NM_001127208         | 6    | Missense          | c.G3637G>A           | p.V1213M          | 16      |
| L1201624 | <i>TET2</i> | NM_001127208         | 11   | In-frame deletion | c.4615_4635del       | p.Q1541_Q1547del  | 48      |

Abbreviations: UPN: unique patient number; VAF, variant allele frequency; NA: not available.

# Supplementary Figures

Figure S1. Representative examples of 2-D plots of droplet fluorescence for *IDH1/2* wild-type controls and *IDH1/2* mutated samples, according to the type of *IDH1/2* mutations.

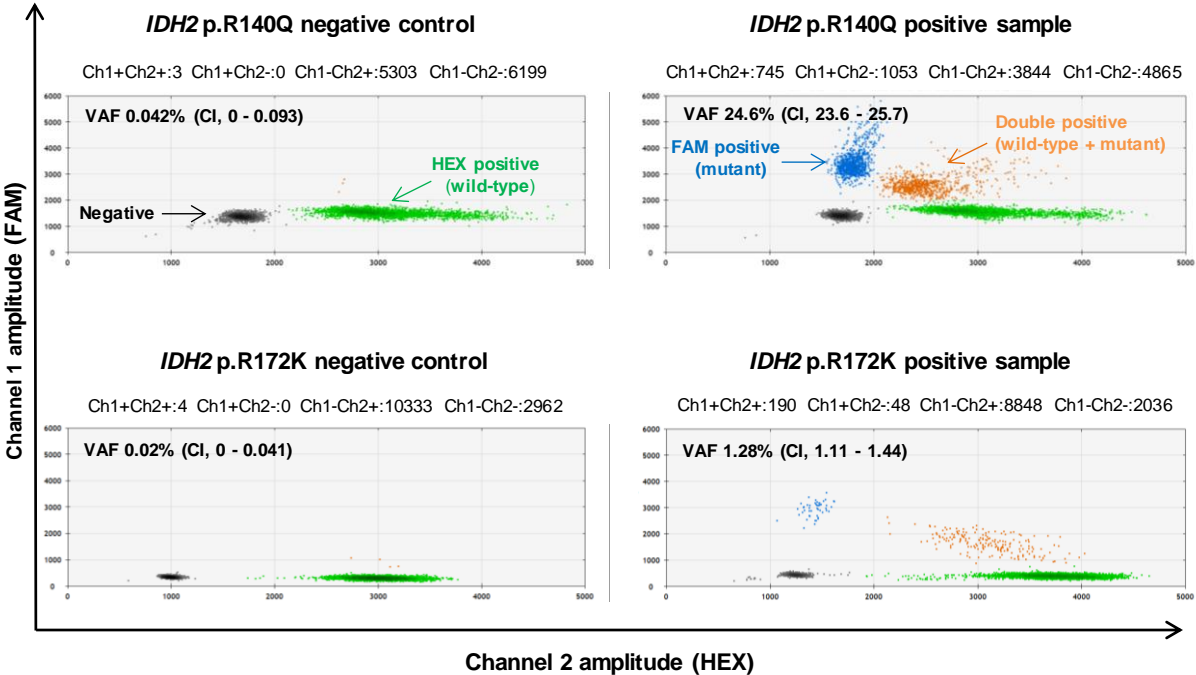

**Figure S1. Representative examples of 2-D plots of droplet fluorescence for *IDH1/2* wild-type controls and *IDH1/2* mutated samples, according to the type of *IDH1/2* mutations (continued).**

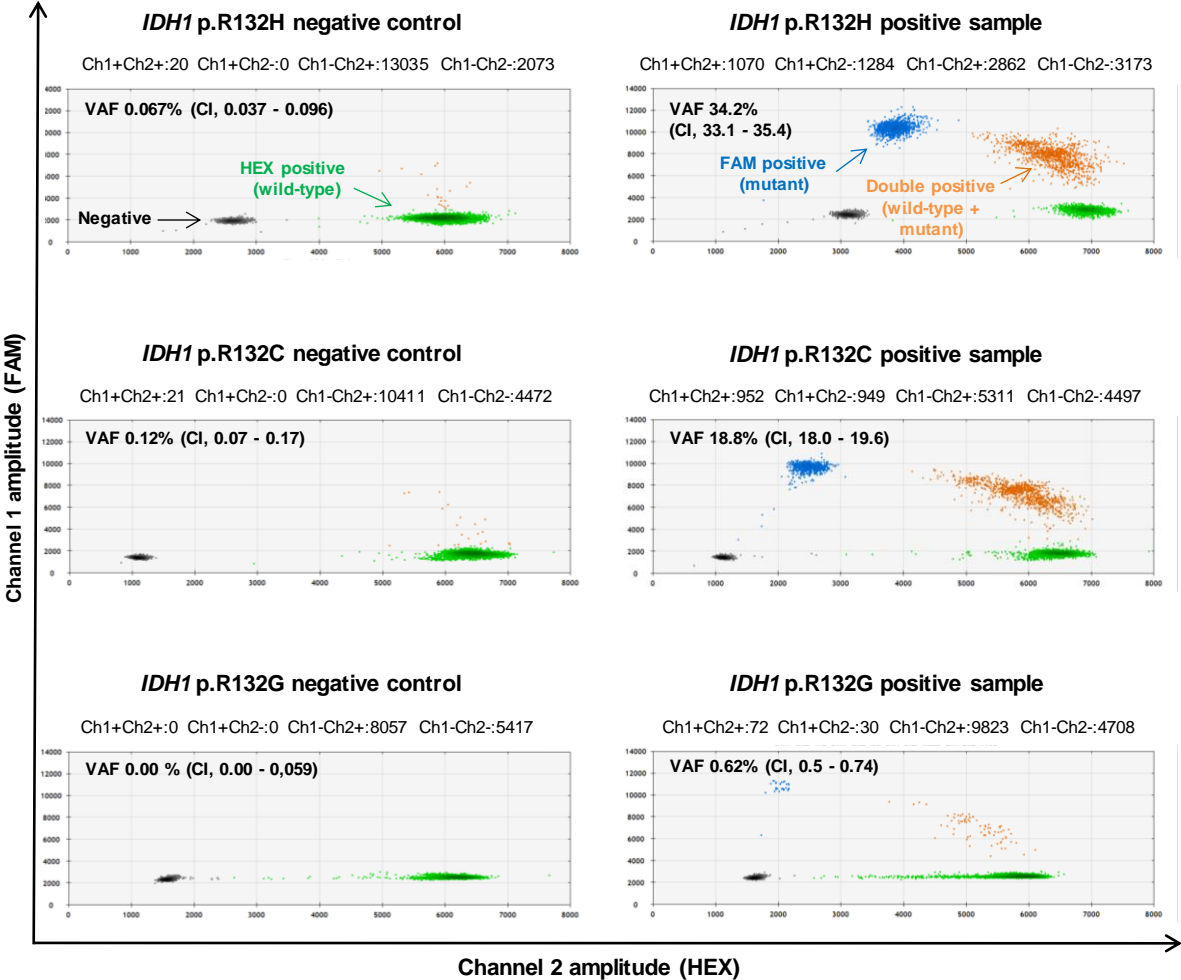

Channel 1 fluorescence (FAM) is plotted against channel 2 fluorescence (HEX) for each droplet. The number of droplets considered per well is indicated above each 2-D plot.

Abbreviations: VAF, variant allele fraction; CI, confidence interval; Ch, channel.

Figure S2. Comparison of the *NPM1* and *IDH1/2* variant allele frequencies in diagnostic samples from 34 patients carrying both mutations.

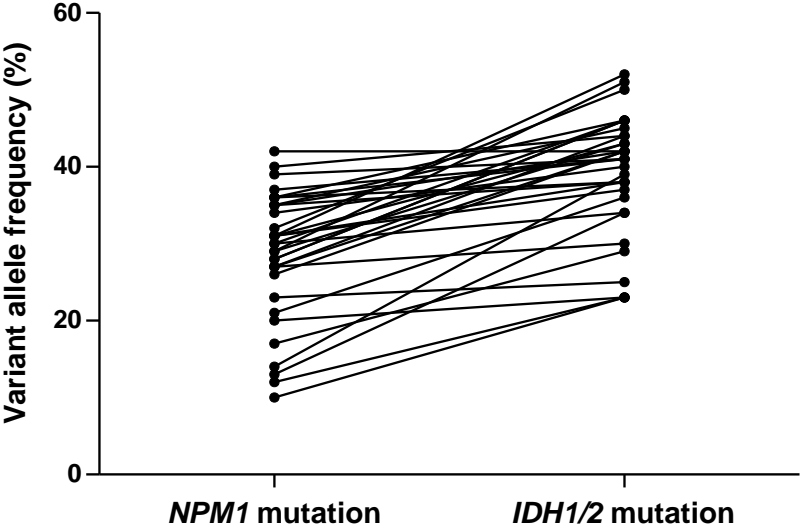



## Supplementary References

- 1 ISCN. In: Mitelman F, ed. ISCN 1995, Guidelines for Cancer Cytogenetics, Supplement to: An International System for Human Cytogenetic Nomenclature. S. Karger; *Basel*, 1995; 1-110.
- 2 Renneville A, Boissel N, Nibourel O, et al. Prognostic significance of DNA methyltransferase 3A mutations in cytogenetically normal acute myeloid leukemia: a study by the Acute Leukemia French Association. *Leukemia* 2012;26(6):1247–1254.
- 3 Boissel N, Renneville A, Biggio V, et al. Prevalence, clinical profile, and prognosis of NPM mutations in AML with normal karyotype. *Blood* 2005;106(10):3618–3620.
- 4 Preudhomme C, Sagot C, Boissel N, et al. Favorable prognostic significance of CEBPA mutations in patients with de novo acute myeloid leukemia: a study from the Acute Leukemia French Association (ALFA). *Blood* 2002;100(8):2717–2723.
